# Supplementary material
Source: Springer Nature journal article supplement (https://www.springermedizin.de/resource/supplementary/13618_2013_87_MOESM3_ESM.pdf/9681166)

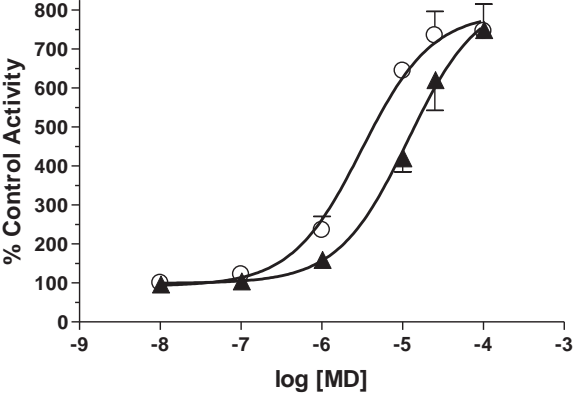

○ FL-hHO-2

▲ HO-2 (rat brain)

Supplement: MOESM3 [file 9681166]
